# Supplementary material for: Amplification-free RNA detection with CRISPR–Cas13
Source: PubMed Central journal article supplement (PMC8055673; doi:10.1038/s42003-021-02001-8), 2021-04-19
Supplement: 42003_2021_2001_MOESM1_ESM.pdf [file 42003_2021_2001_MOESM1_ESM.pdf]

## Supplementary Information

### **Amplification-free RNA detection with CRISPR-Cas13**

Hajime Shinoda, Yuya Taguchi, Ryoya Nakagawa, Asami Makino, Sae Okazaki, Masahiro Nakano, Yukiko Muramoto, Chiharu Takahashi, Ikuko Takahashi, Jun Ando, Takeshi Noda, Osamu Nureki, Hiroshi Nishimasu, Rikiya Watanabe

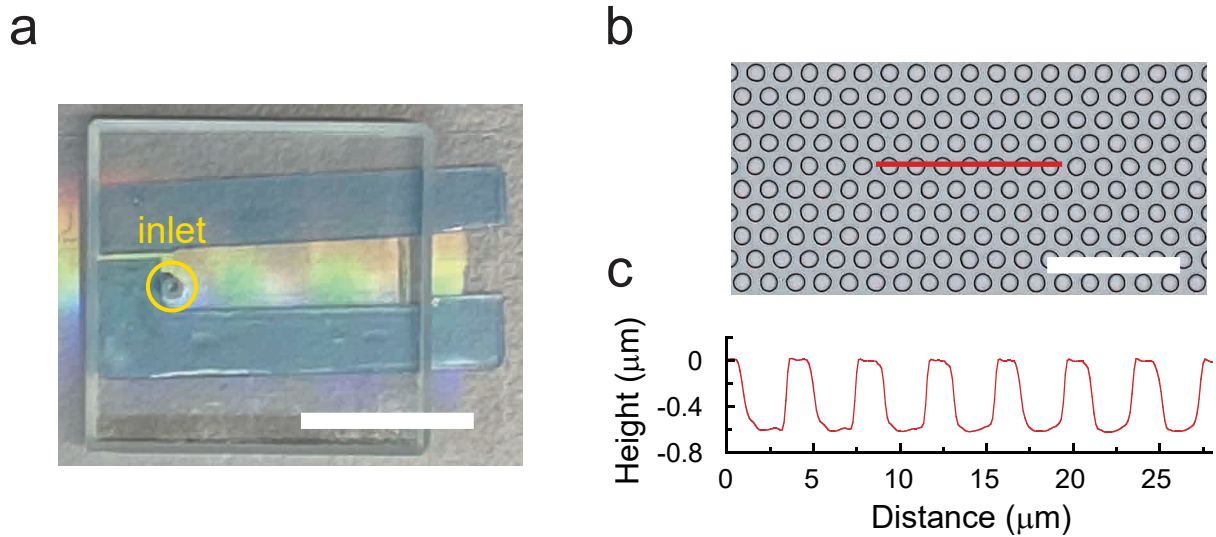

### Supplementary Figure 1. Microchamber device

(a) Top view of the microchamber device. A glass block with an inlet port is attached to a glass substrate containing 1,000,000 microchambers, with a U-shaped spacer seal (light blue) in between. Scale bar, 10 mm. (b) Surface image of the microchamber on a glass substrate, acquired by 3D confocal laser microscopy. Scale bar, 20  $\mu\text{m}$ . (c) Line profile of the cross section on the red line in (b). The average diameter, height, and volume of the chambers are 2.5  $\mu\text{m}$ , 0.6  $\mu\text{m}$ , and 2.9 fL, respectively.

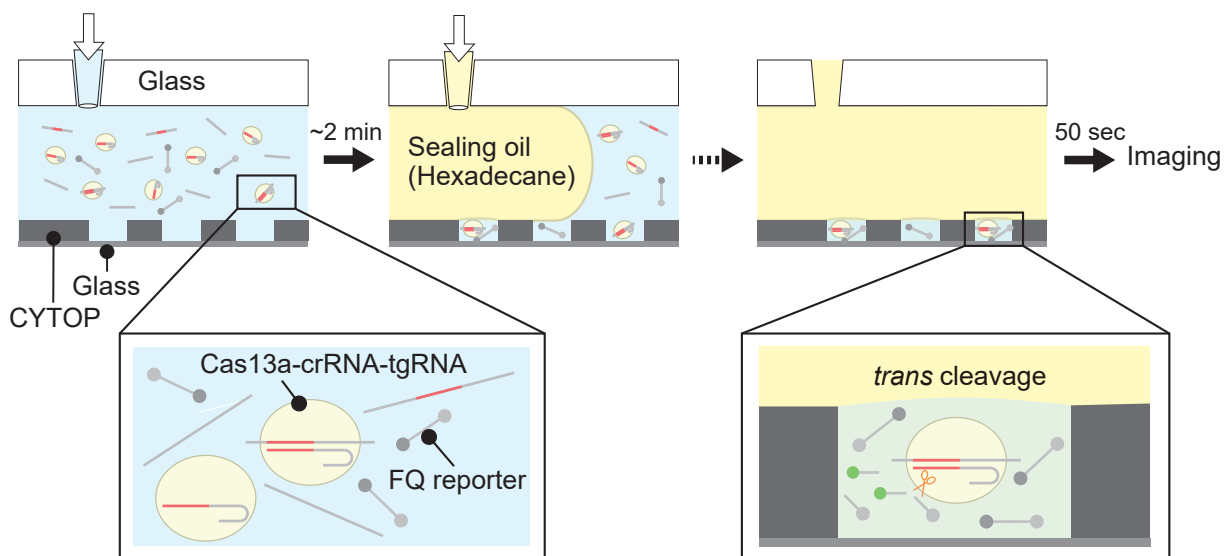

### Supplementary Figure 2. Schematics of assay mixture encapsulation into microchambers

The assay mixture, containing LwaCas13a-crRNA, tgRNA, and FQ-reporter, is loaded into the microchamber device from the inlet in the top glass block. A few minutes afterwards, hexadecane is loaded from the inlet. Because the hydrophobic hexadecane has high affinity to the hydrophobic CYTOP layer on the glass substrate and less affinity to water, the assay mixture is exclusively trapped inside the chambers.

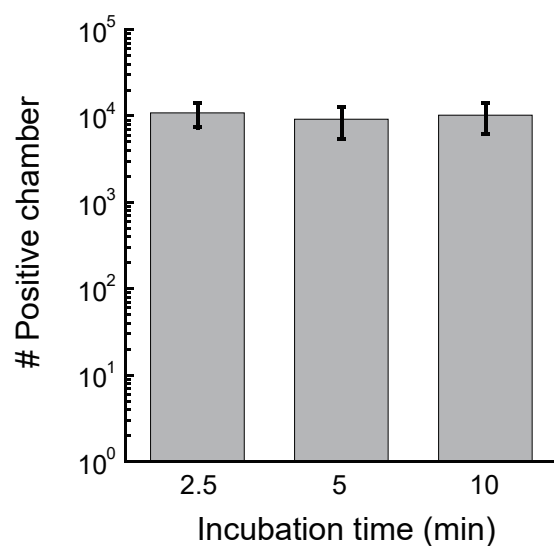

### Supplementary Figure 3. Effects of incubation time with tgRNA

The LwaCas13a-crRNA binary complex was mixed with 30 pM tgRNA, loaded into the microchamber device, and then incubated at 25°C for the indicated times, followed by sealing with hexadecane. The numbers of positive chambers are shown. Data are mean  $\pm$  S.D. (n = 3 technical replicates).

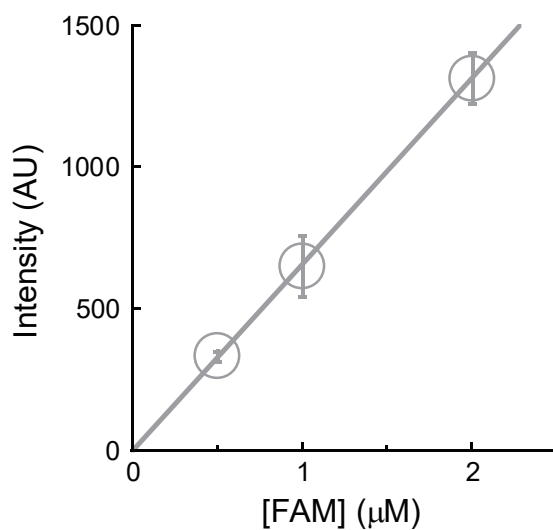

### Supplementary Figure 4. Calibration curve of mean intensity in each chamber to FAM concentration

The FAM-conjugated RNA without any quenchers was loaded into the microchamber device, followed by sealing with hexadecane, and the fluorescence images were then collected. The solid line represents the linear regression, and data are mean  $\pm$  S.D. (n = 3 technical replicates).

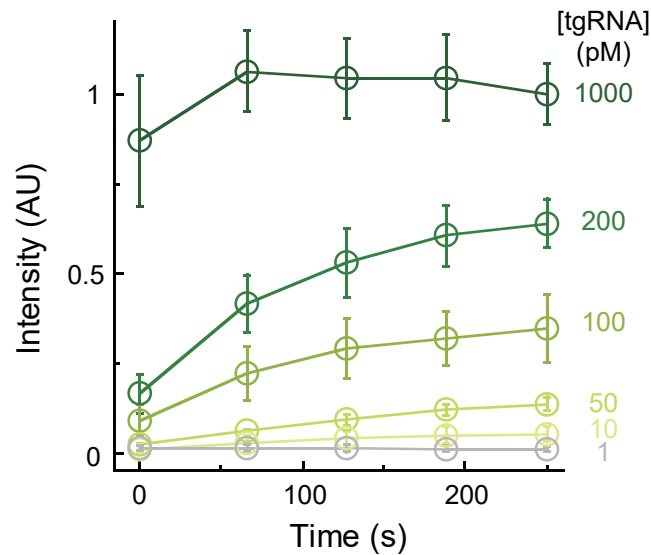

### Supplementary Figure 5. Plate reader-based RNA detection with LwaCas13a

Time courses of fluorescence increases caused by the FQ reporter cleavage are shown. The assay mixture containing LwaCas13a-crRNA and the FQ reporters was mixed with a tgRNA-containing solution at the indicated concentrations, and then the fluorescence time-course was monitored. The fluorescence intensities were normalized by the values obtained with 1 nM tgRNA at 250 s incubation. Data are mean  $\pm$  S.D. ( $n = 3$  technical replicates).

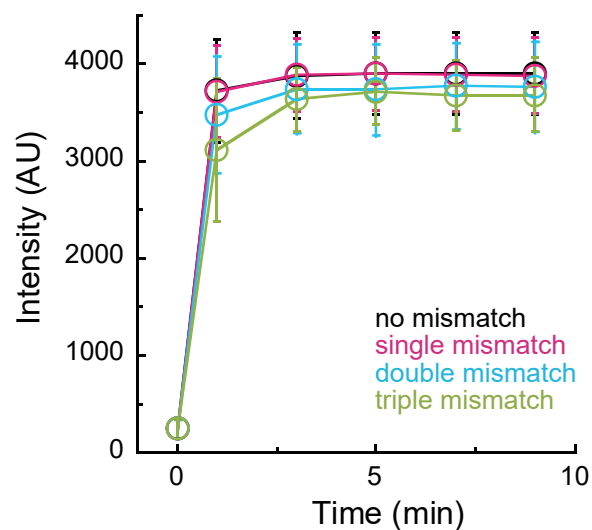

### Supplementary Figure 6. Effects of mismatches between crRNA and tgRNA on the FQ reporter cleavage

Time courses of fluorescence increases caused by FQ reporter cleavage in the absence of mismatches (crRNA1 & tgRNA1, black) or in the presence of single (crRNA6 & tgRNA1, pink), double (crRNA6 & tgRNA2, blue), and triple mismatches (crRNA6 & tgRNA3, green). Data are mean  $\pm$  S.D. ( $n = 3$  technical replicates).



**Supplementary Table 1. crRNA sequences used in this study.**

| Name           | Sequence                                                              |
|----------------|-----------------------------------------------------------------------|
| crRNA1         | GGAUUUAGACUACCCCAAAAACGAAGGGGACUAAAACUAGAUUGCUGUUCU<br>ACCAAGUAAUCCAU |
| crRNA2         | GGAUUUAGACUACCCCAAAAACGAAGGGGACUAAAACAAGAUUGCUGUUCU<br>ACCAAGUAAUCCAU |
| crRNA3         | GGAUUUAGACUACCCCAAAAACGAAGGGGACUAAAACUUGAUUGCUGUUCU<br>ACCAAGUAAUCCAU |
| crRNA4         | GGAUUUAGACUACCCCAAAAACGAAGGGGACUAAAACUACAUUGCUGUUCU<br>ACCAAGUAAUCCAU |
| crRNA5         | GGAUUUAGACUACCCCAAAAACGAAGGGGACUAAAACUAGUUUGCUGUUCU<br>ACCAAGUAAUCCAU |
| crRNA6         | GGAUUUAGACUACCCCAAAAACGAAGGGGACUAAAACUAGAUGCUGUUCU<br>ACCAAGUAAUCCAU  |
| crRNA7         | GGAUUUAGACUACCCCAAAAACGAAGGGGACUAAAACUAGAUAGCUGUUCU<br>ACCAAGUAAUCCAU |
| crRNA8         | GGAUUUAGACUACCCCAAAAACGAAGGGGACUAAAACUAGAUACCUGUUCU<br>ACCAAGUAAUCCAU |
| crRNA9         | GGAUUUAGACUACCCCAAAAACGAAGGGGACUAAAACAAGAUUGGUGUUCU<br>ACCAAGUAAUCCAU |
| crRNA10        | GGAUUUAGACUACCCCAAAAACGAAGGGGACUAAAACAAGAUUGCAGUUCU<br>ACCAAGUAAUCCAU |
| crRNA11        | GGAUUUAGACUACCCCAAAAACGAAGGGGACUAAAACAAGAUUGCUCUUCU<br>ACCAAGUAAUCCAU |
| crRNA-CoV-N-1  | GGAUUUAGACUACCCCAAAAACGAAGGGGACUAAAACAAGGUCUUCUUGC<br>CAUGUUGAGUGAGA  |
| crRNA-CoV-N-2  | GGAUUUAGACUACCCCAAAAACGAAGGGGACUAAAACUAGCUCUUCGGUAG<br>UAGCCAAUUUGGUC |
| crRNA-CoV-N-3  | GGAUUUAGACUACCCCAAAAACGAAGGGGACUAAAACGUUGCAACCAUUAU<br>GAUGCCGUCUUUGU |
| crRNA-CoV-N-4  | GGAUUUAGACUACCCCAAAAACGAAGGGGACUAAAACUJGGCAAUGUUGUU<br>CCUUGAGGAAGUUG |
| crRNA-CoV-N-5  | GGAUUUAGACUACCCCAAAAACGAAGGGGACUAAAACCUUGACUGCCGCCU<br>CUGCUCUUCUGC   |
| crRNA-CoV-N-6  | GGAUUUAGACUACCCCAAAAACGAAGGGGACUAAAACCCUUGUUGUUGUU<br>GGCCUUUACCAGACA |
| crRNA-CoV-N-7  | GGAUUUAGACUACCCCAAAAACGAAGGGGACUAAAACUUUGUUCUGGACCA<br>CGUCUGCCGAAAGC |
| crRNA-CoV-N-8  | GGAUUUAGACUACCCCAAAAACGAAGGGGACUAAAACAAUUUGCGGCCAAU<br>GUUUGUAAUCAGUU |
| crRNA-CoV-N-9  | GGAUUUAGACUACCCCAAAAACGAAGGGGACUAAAACAUUCCGAAGAACGC<br>UGAAGCGCUGGGGG |
| crRNA-CoV-N-10 | GGAUUUAGACUACCCCAAAAACGAAGGGGACUAAAACGGCACCUGUGUAG<br>GUCAACCACGUUCCC |

**Supplementary Table 2. Target RNA sequences used in this study.**

| Name       | Sequence                                                                                                                                                                                                                                                                                                                                                                                                                                                                                                                                                                                                                                                                                                                                                                                                                                                                                                                                                                                                                                                                                                                                                                                                                                                                                                                                                                       |
|------------|--------------------------------------------------------------------------------------------------------------------------------------------------------------------------------------------------------------------------------------------------------------------------------------------------------------------------------------------------------------------------------------------------------------------------------------------------------------------------------------------------------------------------------------------------------------------------------------------------------------------------------------------------------------------------------------------------------------------------------------------------------------------------------------------------------------------------------------------------------------------------------------------------------------------------------------------------------------------------------------------------------------------------------------------------------------------------------------------------------------------------------------------------------------------------------------------------------------------------------------------------------------------------------------------------------------------------------------------------------------------------------|
| tgRNA1     | GGGGGCCAGUGAAUUCGAGCUCGGUACCCGGGGAUCCUCUAGAAAU <b>AUGGAUUAC</b><br><b>UUGGUAGAACAGCAAUCUA</b> CUCGACCUGCAGGCAUGCAAGCUUGGCGUAAUCAUGG<br>UCAUAGCUG                                                                                                                                                                                                                                                                                                                                                                                                                                                                                                                                                                                                                                                                                                                                                                                                                                                                                                                                                                                                                                                                                                                                                                                                                               |
| tgRNA2     | GGGGGCCAGUGAAUUCGAGCUCGGUACCCGGGGAUCCUCUAGAAAU <b>AUGGAUUAC</b><br><b>UUGGUAGAACAGCAAUG</b> JACUCGACCUGCAGGCAUGCAAGCUUGGCGUAAUCAUGG<br>UCAUAGCUG                                                                                                                                                                                                                                                                                                                                                                                                                                                                                                                                                                                                                                                                                                                                                                                                                                                                                                                                                                                                                                                                                                                                                                                                                               |
| tgRNA3     | GGGGGCCAGUGAAUUCGAGCUCGGUACCCGGGGAUCCUCUAGAAAU <b>AUGGAUUAC</b><br><b>UUGGUAGAACAGCUAU</b> GJACUCGACCUGCAGGCAUGCAAGCUUGGCGUAAUCAUG<br>GUCAUAGCUG                                                                                                                                                                                                                                                                                                                                                                                                                                                                                                                                                                                                                                                                                                                                                                                                                                                                                                                                                                                                                                                                                                                                                                                                                               |
| SARS-CoV-N | AUGUCUGAUAUUGGACCCCAAAUUCAGCGAAAUGCACCCCGCAUUACGUUUGGUGG<br>ACCCUCAGAUUCAACUGGCAGUAACCAGAAUGGAGAACGCAGUGGGCGCGAUCAA<br>AACAAACGUCGGCCCAAGGUUUACCCAAUAAUACUGCGUCUUGGUUCACCGCUCUC<br>ACUCAACAUGGCAAGGAAGACCUUAAAUCCUCGAGGACAAGGCGUUCCAAUUA<br>CACCAAUAGCAGUCCAGAUAGCCAAAUUGGCUACUACCGAAGAGCUACCAGACGAA<br>UUCGUGGUGGUGACGGUAAAUGAAAGAUCUCAGUCCAAGAUGGUUUUCUACUAC<br>CUAGGAACUGGGCCAGAAGCUGGACUUCUUAUGGUGCUAACAAGACGGCAUCAU<br>AUGGGUUGCAACUGAGGGAGCCUUGAAUACACCAAAAGAUACAUUGGCACCCGCA<br>AUCCUGCUAACAUGCUGCAAUCGUGCUACAACUCCUCAAGGAACAACAUUGCCA<br>AAAGGCUUCUACGCAGAAGGGAGCAGAGGGCGGAGUCAAGCCUCUUCUGUCCU<br>CAUCACGUAGUCGCAACAGUUAAGAAUUAACUCCAGGCAGCAGUAGGGGAACU<br>UCUCCUGCUAGAAUGGCUUGGCAUUGGCGGUGAUGCUGCUCUUGCUUUGCUGCUGC<br>UUGACAGAUUGAACAGCUUGAGAGCAAAAUGUCUGGUAAAGGCCAACAACAACA<br>GGCCAAACUGUCACUAAGAAAUCUGCUGCUGAGGCUUCUAAGAAGCCUCGGCAAAA<br>ACGUACUGCCACUAAAAGCAUACAUGUAACACAAGCUUUCGGCAGACGUGGUCCAG<br>AACAAACCCAAGGAAUUUUGGGGACCAGGAACUAAUCAGACAAGGAACUGAUUACA<br>AACAUUGGCCGCAAAUUGCACAAUUUGCCCCAGCGCUUCAGCGUUCUUCGGAAUG<br>UCGCGCAUUGGCAUGGAAGUCACACCUUCGGAACGUGGUUGACCUACACAGGUG<br>CCAUCAAAUUGGAUGACAAAGAUCCA AAUUUCAAAAGAUCAAGUCAUUUUGCUGAAUA<br>AGCAU AUUGACGCAUACAAAACAUUCCACCAACAGAGCCUAAAAGGACAAAAAGA<br>AGAAGGCUGAUGAAACUCAAGCCUUAACGAGAGACAGAAGAAACAGCAAACUGUG<br>ACUCUUCUUCUGCUGCAGAUUUGGAUGAUUUUCUCAAACAAUUGCAACAAUCCA<br>GAGCAGUGCUGACUCAACUCAGGCCUAA |

**Supplementary Table 3. FQ reporter used in this study.**

| Name        | Sequence                          |
|-------------|-----------------------------------|
| FQ reporter | 5'-/56-FAM/rUrUrUrUrU/3IABkFQ/-3' |

**Supplementary Table 4. Primers used in this study.**

| Name        | Sequence                                                                                      |
|-------------|-----------------------------------------------------------------------------------------------|
| crRNA-T7P-f | GGATCCTAATACGACTCACTATA                                                                       |
| crRNA1-r    | ATGGATTACTTGGTAGAACAGCAATCTAGTTTTAGTCCCCTTCGTTTTTGGGGTAGT<br>CTAAATCCTATAGTGAGTCGTATTAGGATCC  |
| crRNA2-r    | ATGGATTACTTGGTAGAACAGCAATCTTGTTTTTAGTCCCCTTCGTTTTTGGGGTAGT<br>CTAAATCCTATAGTGAGTCGTATTAGGATCC |
| crRNA3-r    | ATGGATTACTTGGTAGAACAGCAATCAAGTTTTAGTCCCCTTCGTTTTTGGGGTAGT<br>CTAAATCCTATAGTGAGTCGTATTAGGATCC  |
| crRNA4-r    | ATGGATTACTTGGTAGAACAGCAATGTAGTTTTAGTCCCCTTCGTTTTTGGGGTAGT<br>CTAAATCCTATAGTGAGTCGTATTAGGATCC  |

|                  |                                                                                                                                                         |
|------------------|---------------------------------------------------------------------------------------------------------------------------------------------------------|
| crRNA5-r         | ATGGATTACTTGGTAGAACAGCAAAGTAGTTTTAGTCCCCTTCGTTTTTGGGGTAGT<br>CTAAATCCTATAGTGAGTCGTATTAGGATCC                                                            |
| crRNA6-r         | ATGGATTACTTGGTAGAACAGCATTCTAGTTTTAGTCCCCTTCGTTTTTGGGGTAGT<br>CTAAATCCTATAGTGAGTCGTATTAGGATCC                                                            |
| crRNA7-r         | ATGGATTACTTGGTAGAACAGCATTCTAGTTTTAGTCCCCTTCGTTTTTGGGGTAGT<br>CTAAATCCTATAGTGAGTCGTATTAGGATCC                                                            |
| crRNA8-r         | ATGGATTACTTGGTAGAACAGGAATCTAGTTTTAGTCCCCTTCGTTTTTGGGGTAGT<br>CTAAATCCTATAGTGAGTCGTATTAGGATCC                                                            |
| crRNA9-r         | ATGGATTACTTGGTAGAACACCAATCTAGTTTTAGTCCCCTTCGTTTTTGGGGTAGT<br>CTAAATCCTATAGTGAGTCGTATTAGGATCC                                                            |
| crRNA10-r        | ATGGATTACTTGGTAGAACTGCAATCTAGTTTTAGTCCCCTTCGTTTTTGGGGTAGT<br>CTAAATCCTATAGTGAGTCGTATTAGGATCC                                                            |
| crRNA11-r        | ATGGATTACTTGGTAGAAGAGCAATCTAGTTTTAGTCCCCTTCGTTTTTGGGGTAGT<br>CTAAATCCTATAGTGAGTCGTATTAGGATCC                                                            |
| crRNA-CoV-N-1-r  | CCCCAGCGCTTCAGCGTTCTTCGGAATGTTTTAGTCCCCTTCGTTTTTGGGGTAG<br>TCTAAATCCTATAGTGAGTCGTATTAGGATCC                                                             |
| crRNA-CoV-N-2-r  | CAACAGAGCCTAAAAAGGACAAAAAGAAGTTTTAGTCCCCTTCGTTTTTGGGGTAG<br>TCTAAATCCTATAGTGAGTCGTATTAGGATCC                                                            |
| crRNA-CoV-N-3-r  | GGGAACGTGGTTGACCTACACAGGTGCCGTTTTAGTCCCCTTCGTTTTTGGGGTA<br>GTCTAAATCCTATAGTGAGTCGTATTAGGATCC                                                            |
| crRNA-CoV-N-4-r  | GCTTTCGGCAGACGTGGTCCAGAACAAGTTTTAGTCCCCTTCGTTTTTGGGGTAG<br>TCTAAATCCTATAGTGAGTCGTATTAGGATCC                                                             |
| crRNA-CoV-N-5-r  | CTTCTAAGAAGCCTCGGCAAAAACGTACGTTTTAGTCCCCTTCGTTTTTGGGGTAG<br>TCTAAATCCTATAGTGAGTCGTATTAGGATCC                                                            |
| crRNA-CoV-N-6-r  | CCAGGCAGCAGTAGGGGAAGTTCTCCTGGTTTTAGTCCCCTTCGTTTTTGGGGTAG<br>TCTAAATCCTATAGTGAGTCGTATTAGGATCC                                                            |
| crRNA-CoV-N-7-r  | GCAGAAGGGAGCAGAGGCGGCAGTCAAGGTTTTAGTCCCCTTCGTTTTTGGGGTA<br>GTCTAAATCCTATAGTGAGTCGTATTAGGATCC                                                            |
| crRNA-CoV-N-8-r  | TACCTAGGAAGTGGGCCAGAAGCTGGACGTTTTAGTCCCCTTCGTTTTTGGGGTAG<br>TCTAAATCCTATAGTGAGTCGTATTAGGATCC                                                            |
| crRNA-CoV-N-9-r  | GACCAAATTGGCTACTACCGAAGAGCTAGTTTTAGTCCCCTTCGTTTTTGGGGTAG<br>TCTAAATCCTATAGTGAGTCGTATTAGGATCC                                                            |
| crRNA-CoV-N-10-r | GTGGGGCGCGATCAAACAACGTCCGCCGTTTTAGTCCCCTTCGTTTTTGGGGTA<br>GTCTAAATCCTATAGTGAGTCGTATTAGGATCC                                                             |
| tgRNA1-r         | CAGCTATGACCATGATTACGCCAAGCTTGCATGCCTGCAGGTCGAGTAGATTGCTG<br>TTCTACCAAGTAATCCATATTTCTAGAGGATCCCCGGGTACCGAGCTCGAATTCACT<br>GGCCcccTATAGTGAGTCGTATTAGGATCC |
| tgRNA2-r         | CAGCTATGACCATGATTACGCCAAGCTTGCATGCCTGCAGGTCGAGTACATTGCTG<br>TTCTACCAAGTAATCCATATTTCTAGAGGATCCCCGGGTACCGAGCTCGAATTCACT<br>GGCCcccTATAGTGAGTCGTATTAGGATCC |
| tgRNA3-r         | CAGCTATGACCATGATTACGCCAAGCTTGCATGCCTGCAGGTCGAGTACATAGCTGT<br>TCTACCAAGTAATCCATATTTCTAGAGGATCCCCGGGTACCGAGCTCGAATTCACTG<br>GCCcccTATAGTGAGTCGTATTAGGATCC |
| CoV-N-FL-PCR-f   | GGATCCTAATACGACTCACTATAGGATGTCTGATAATGGACCCCAAATCAGC                                                                                                    |
| CoV-N-FL-PCR-r   | TTAGGCCTGAGTTGAGTCAGCACTG                                                                                                                               |



**Supplementary Table 5. Cost /micro-chamber device.**

| Material                       | Cost (US\$) |
|--------------------------------|-------------|
| 32 mm × 24 mm cover glass      | 0.10        |
| KOH solution                   | < 0.10      |
| Perfluoro-polymer (CYTOP)      | 0.30        |
| Photoresist (AZ P4620)         | 0.10        |
| Developer (AZ300 MIF)          | 0.80        |
| Acetone                        | < 0.10      |
| Isopropanol                    | < 0.10      |
| Frame chamber seal             | 1.90        |
| Glass block with an inlet port | 2.00        |
| Total                          | 5.20        |

**Supplementary Table 6. Cost/ assay mixture.**

| Material                                                                                    | Cost (US\$) |
|---------------------------------------------------------------------------------------------|-------------|
| Buffer D<br>(20 mM HEPES (pH 7.5), 150 mM KCl,<br>10 mM MgCl <sub>2</sub> , and 0.5 mM DTT) | < 0.10      |
| FQ reporter                                                                                 | 3.30        |
| Triton X-100                                                                                | < 0.10      |
| Alexa Fluor™ 647 C <sub>2</sub> Maleimide                                                   | 0.60        |
| Total                                                                                       | 3.90        |
