# Supplementary material for: Amplification-free RNA detection with CRISPR–Cas13
Source: PubMed Central journal article supplement (PMC8055673; doi:10.1038/s42003-021-02001-8), 2021-04-19
Supplement: 42003_2021_2001_MOESM2_ESM.pdf [file 42003_2021_2001_MOESM2_ESM.pdf]

## Description of Additional Supplementary Files

**File name:** Supplementary Data 1

**Description:** Source data for main figures.
